# Supplementary material for: Proteolysis regulates cardiomyocyte maturation and tissue integration
Source: PubMed Central journal article supplement (PMC5321751; doi:10.1038/ncomms14495), 2017-02-17
Supplement: ncomms14495-s1.pdf [file ncomms14495-s1.pdf]

Supplementary Figures

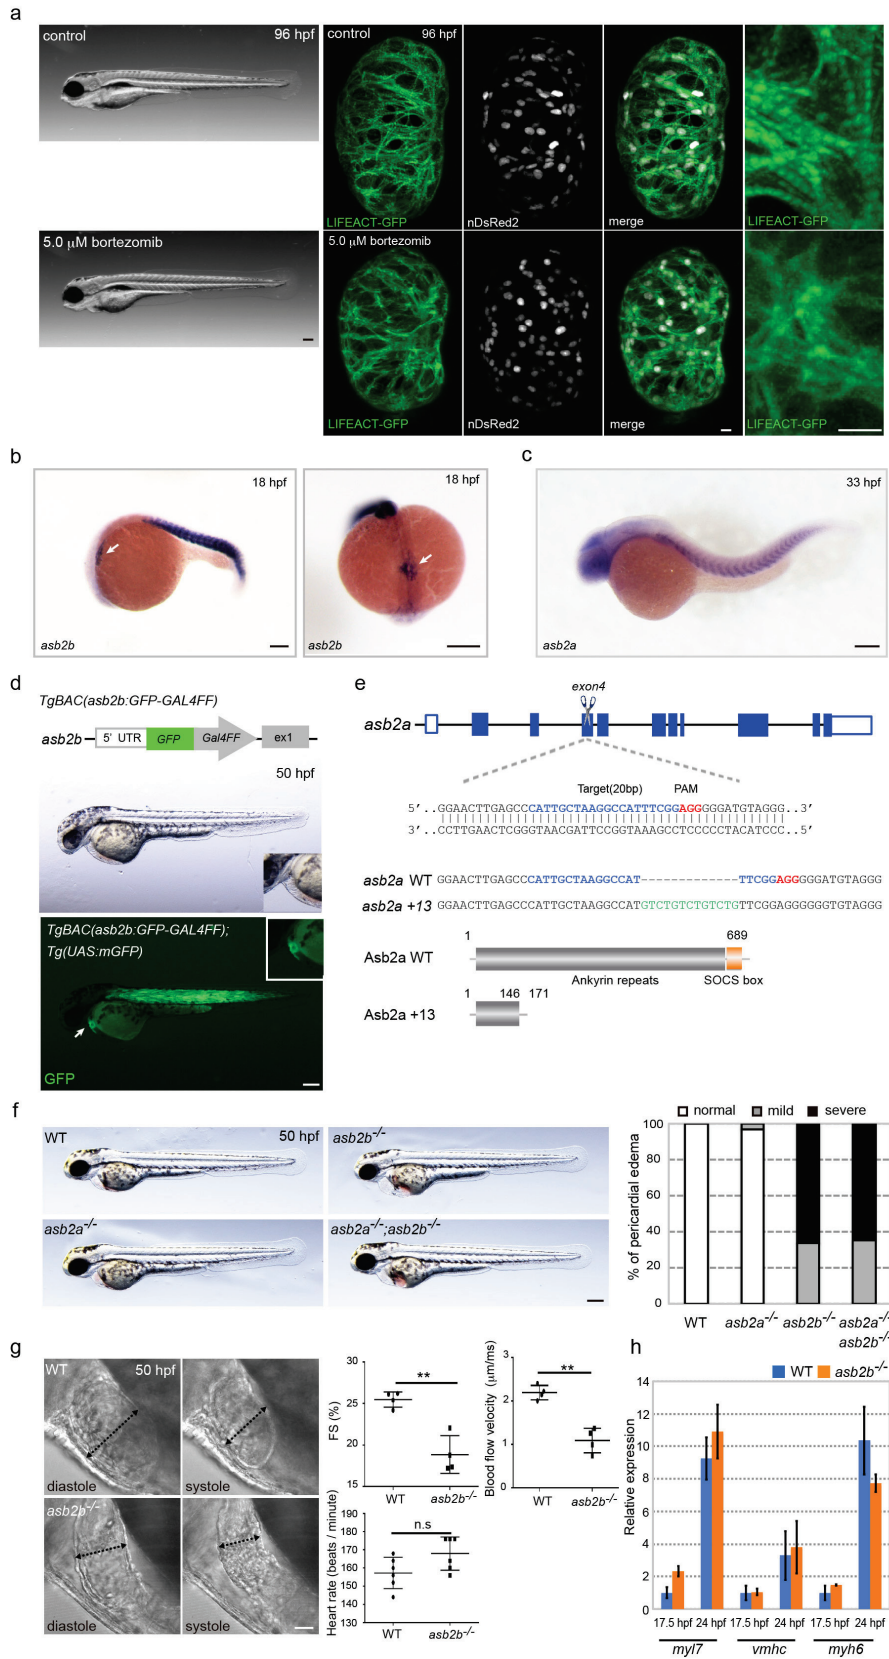

Supplementary Figure 1 - *asb2b* mutant zebrafish exhibit cardiac defects. (a) Bright-field micrographs of 96 hpf larvae treated with DMSO (control) and bortezomib. Lateral

views, anterior to the left. Scale bar, 200  $\mu\text{m}$ . 3D images of 96 hpf *Tg(myl7:LIFEACT-GFP)* hearts in animals treated with DMSO (control) and bortezomib. Animals were treated from 24 until 96 hpf. Scale bar, 20  $\mu\text{m}$ . (b) *in situ* hybridization for *asb2b* expression in 18 hpf embryos. Lateral view, anterior to the left; dorsal view, anterior to the bottom. *asb2b* is expressed in the heart cone (arrows) as well as in the somites. (c) *in situ* hybridization for *asb2a* expression in 33 hpf embryos. Lateral view, anterior to the left. Scale bars, 200  $\mu\text{m}$ . (d) Schematic representation of the reporter transgene: a *GFP-GAL4FF-polyA-Km<sup>r</sup>* cassette was inserted at the ATG start codon in an *asb2b* BAC. Lateral views of a 50 hpf *Tg(asb2b:GFP-GAL4FF);Tg(UAS:mGFP)* embryo and close-up views of the heart; anterior to the left. An arrow points to the heart. GFP is expressed in the heart and somites. Scale bar, 200  $\mu\text{m}$ . (e) Schematic representation of *asb2a* locus and the gRNA. Target sequence of gRNA and PAM are highlighted in blue and red, respectively. Inserted nucleotides are indicated in green. Predicted structure of WT and *Asb2a +13* mutant proteins. *asb2a +13* allele is predicted to encode a truncated polypeptide containing 25 incorrect amino acids (147-171 aa). (f) Bright-field micrographs of 50 hpf WT, *asb2a* mutant, *asb2b* mutant, and *asb2a;asb2b* double mutant embryos in lateral views. Scale bar, 200  $\mu\text{m}$ . percentage of WT and mutant embryos exhibiting pericardial edema ( $n=50$  fish). (g) Lateral close-up views of 50 hpf WT and *asb2b* mutant hearts in diastole and systole. Anterior to the left. Two-headed arrows indicate width of the ventricle. Quantification of ventricular fractional shortening (FS) and aortic blood flow velocity in WT and *asb2b* mutants. Heart rate measurement in 50 hpf WT and *asb2b* mutants ( $n=4$  to 6 fish). Scale bar, 20  $\mu\text{m}$ . (h) Relative mRNA expression (qPCR) of *myl7*, *vmhc* and *myh6* expression at 17.5 and 24 hpf in WT and *asb2b* mutants ( $n=2$  technical replicates, RNA samples were obtained from 50 embryos). \*\* $P<0.01$  by one-way analysis of variance (ANOVA) followed by Tukey's HSD test. Error bars, SEM.



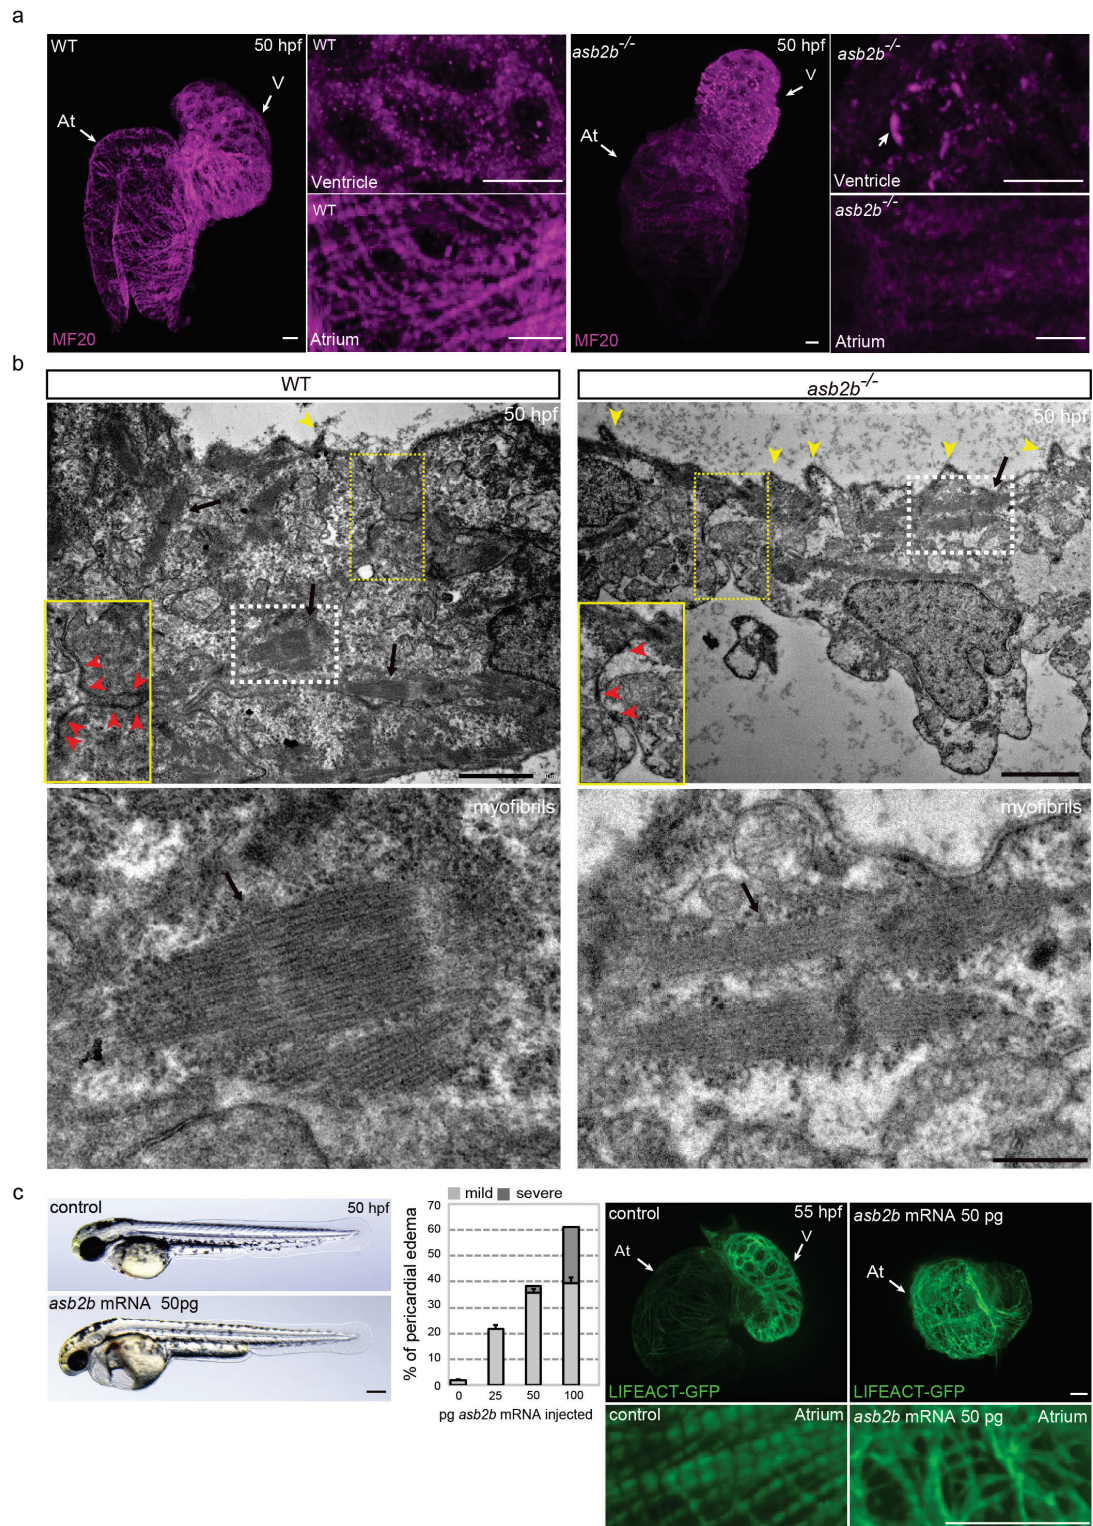

**Supplementary Figure 2 - *asb2b* is involved in myofilament organization.**

(a) 3D images of 50 hpf WT and *asb2b* mutant hearts stained with myosin heavy chain antibody (MF20). At, atrium; V, ventricle. Cardiomyocytes in the WT ventricle exhibit cortical myosin localization, while those in *asb2b* mutants show less cortical localization of myosin and exhibit punctae of myosin (arrow). WT atrial cardiomyocytes exhibit clear myofilaments, whereas fewer myofilaments are observed in *asb2b* mutants. (b) Electron

micrographs of 50 hpf WT and *asb2b* mutant ventricles. Close-up views of the cardiomyocyte cell-cell contact regions in yellow dotted boxes are shown (yellow squares with red arrowheads). Ventricular cardiomyocytes in *asb2b* mutants exhibit fewer regions of cell-cell contact (red arrowheads). *asb2b* mutant cardiomyocytes exhibit many more membrane protrusions (yellow arrowheads) compared to WT. Scale bars, 2  $\mu\text{m}$ . Magnified views of myofilaments in white dotted boxes are shown (black arrows). Scale bar, 0.5  $\mu\text{m}$ . (c) Lateral views of a 50 hpf control embryo and an embryo injected with 50 pg *asb2b* mRNA. Anterior to the left. Scale bar, 200  $\mu\text{m}$ . Number of fish showing pericardial edema ( $n=60$  fish). 1-cell stage embryos were injected with different amounts of *asb2b* mRNA and analyzed at 55 hpf. 3D images and close-up views of *Tg(myl7:LIFEACT-GFP)* hearts of 55 hpf embryos injected with 50 pg *asb2b* mRNA. At, atrium; V, ventricle. Error bars, SEM. Scale bars, 20  $\mu\text{m}$ .



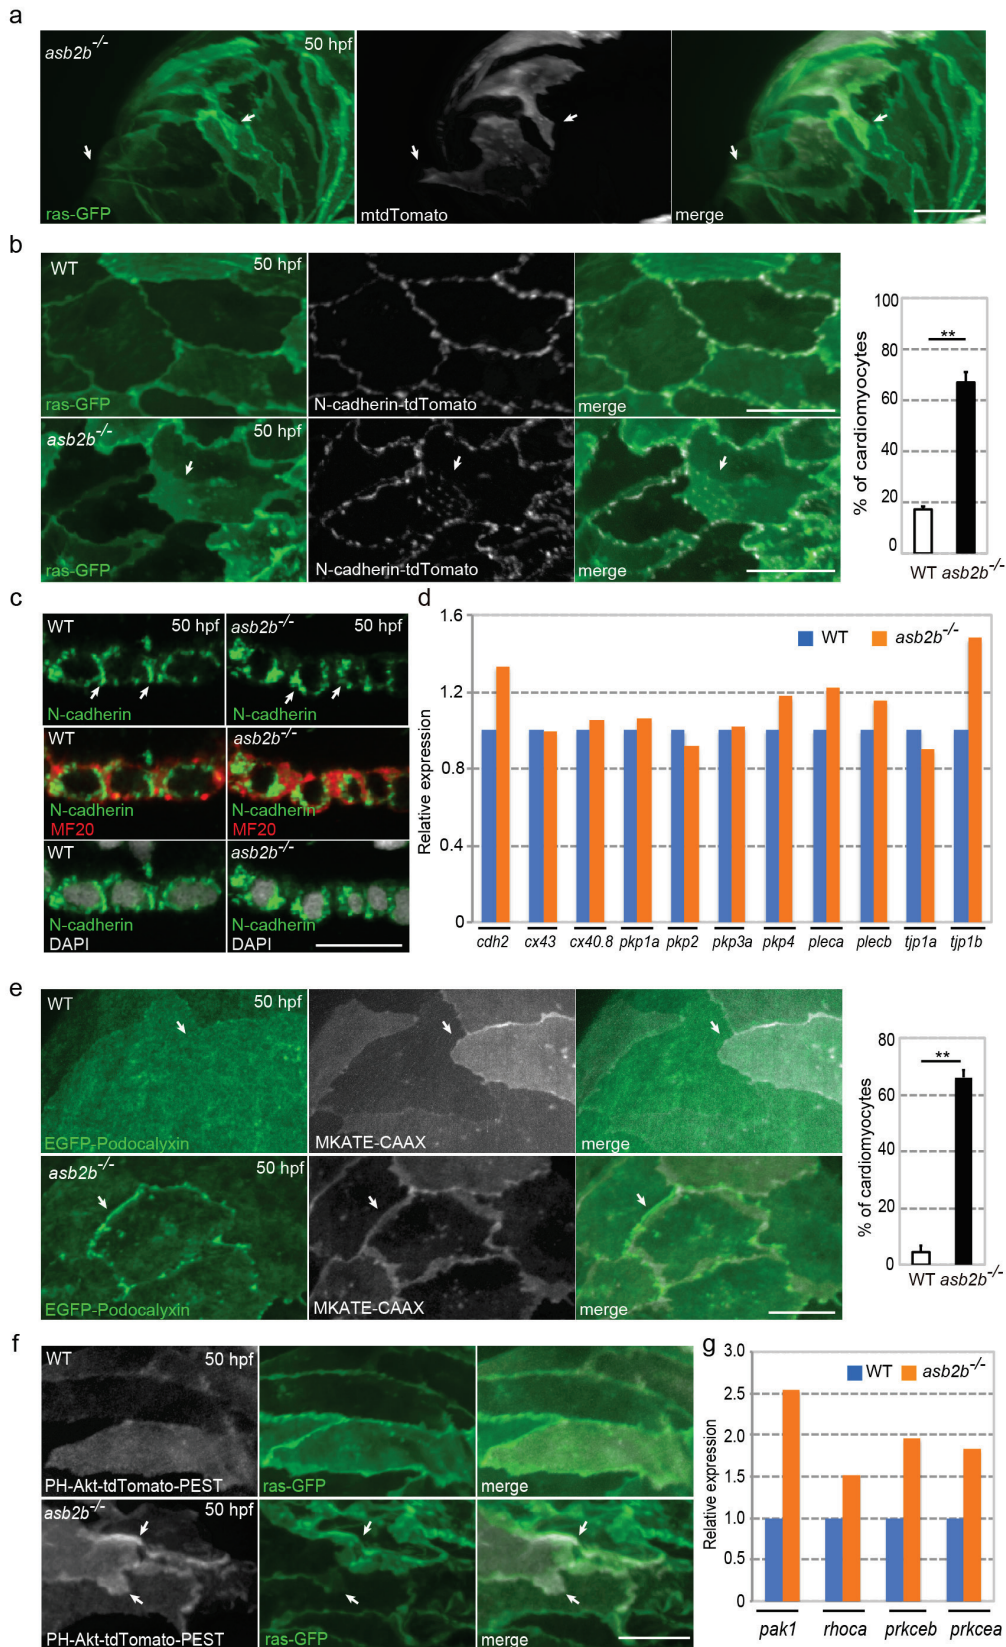

**Supplementary Figure 3 – *asb2b* mutant cardiomyocytes exhibit irregular cell-cell junctions.** (a) 3D images of 50 hpf *Tg(myl7:ras-GFP) asb2b* mutant atria mosaically expressing membrane-tdTomato (*mtdTomato*). Mosaic expression of *mtdTomato* was achieved by injecting a *myl7:mtdTomato* plasmid into *Tg(myl7:ras-GFP) asb2b* mutant

one-cell stage embryos. Membrane protrusions of mtdTomato positive cardiomyocytes are shown (arrows). (b) 3D images of 50 hpf *Tg(myl7:ras-GFP);Tg(myl7:N-cadherin-tdTomato)* WT and *asb2b* mutant atria. N-cadherin-tdTomato molecules in WT cardiomyocytes exhibit lateral localization in cell-cell junctions, while those in *asb2b* mutants also exhibit localization in overlapping regions (arrows). Number of cardiomyocytes exhibiting N-cadherin-tdTomato punctae in overlapping regions with neighbouring cardiomyocytes in 50 hpf WT and *asb2b* mutant hearts ( $n=5$  hearts, with averages taken from 25 cardiomyocytes per heart). (c) Co-staining for N-cadherin (green), Myosin heavy chain (MF20, red) and DAPI (white) in 50 hpf WT and *asb2b* mutant hearts, transverse views. No obvious differences in N-cadherin expression are observed (arrows). (d) Relative mRNA expression (microarray) of junction component genes in isolated 50 hpf WT and *asb2b* mutant hearts. Gene names can be found in Supplementary Table 1. (e) 3D images of 50 hpf *Tg(myl7:EGFP-Podocalyxin);Tg(myl7:MKATE-CAAX)* WT and *asb2b* mutant atria. In WT hearts, EGFP-Podocalyxin shows uniform distribution across cell-cell borders (arrows), while those in *asb2b* mutants exhibit peripheral localization (arrows). Number of cardiomyocytes exhibiting EGFP-Podocalyxin localization in cardiomyocyte cell-cell borders in 50 hpf WT and *asb2b* mutant hearts ( $n=5$  hearts, with averages taken from 20 cardiomyocytes per heart). (f) 3D images of 50 hpf *Tg(myl7:ras-GFP)* WT and *asb2b* mutant atria expressing PH-Akt-tdTomato-PEST. *asb2b* mutant cardiomyocytes exhibit enriched localization of PH-Akt-tdTomato-PEST in membrane protrusions (arrows). (g) Relative mRNA expression (microarray) of *pak1*, *rhoa*, *prkceb* and *prkcea* in isolated 50 hpf WT and *asb2b* mutant hearts. Gene names can be found in Supplementary Table 1. \*\* $P<0.01$  by one-way analysis of variance (ANOVA) followed by Tukey's HSD test. Error bars, SEM. Scale bars, 20  $\mu\text{m}$ .

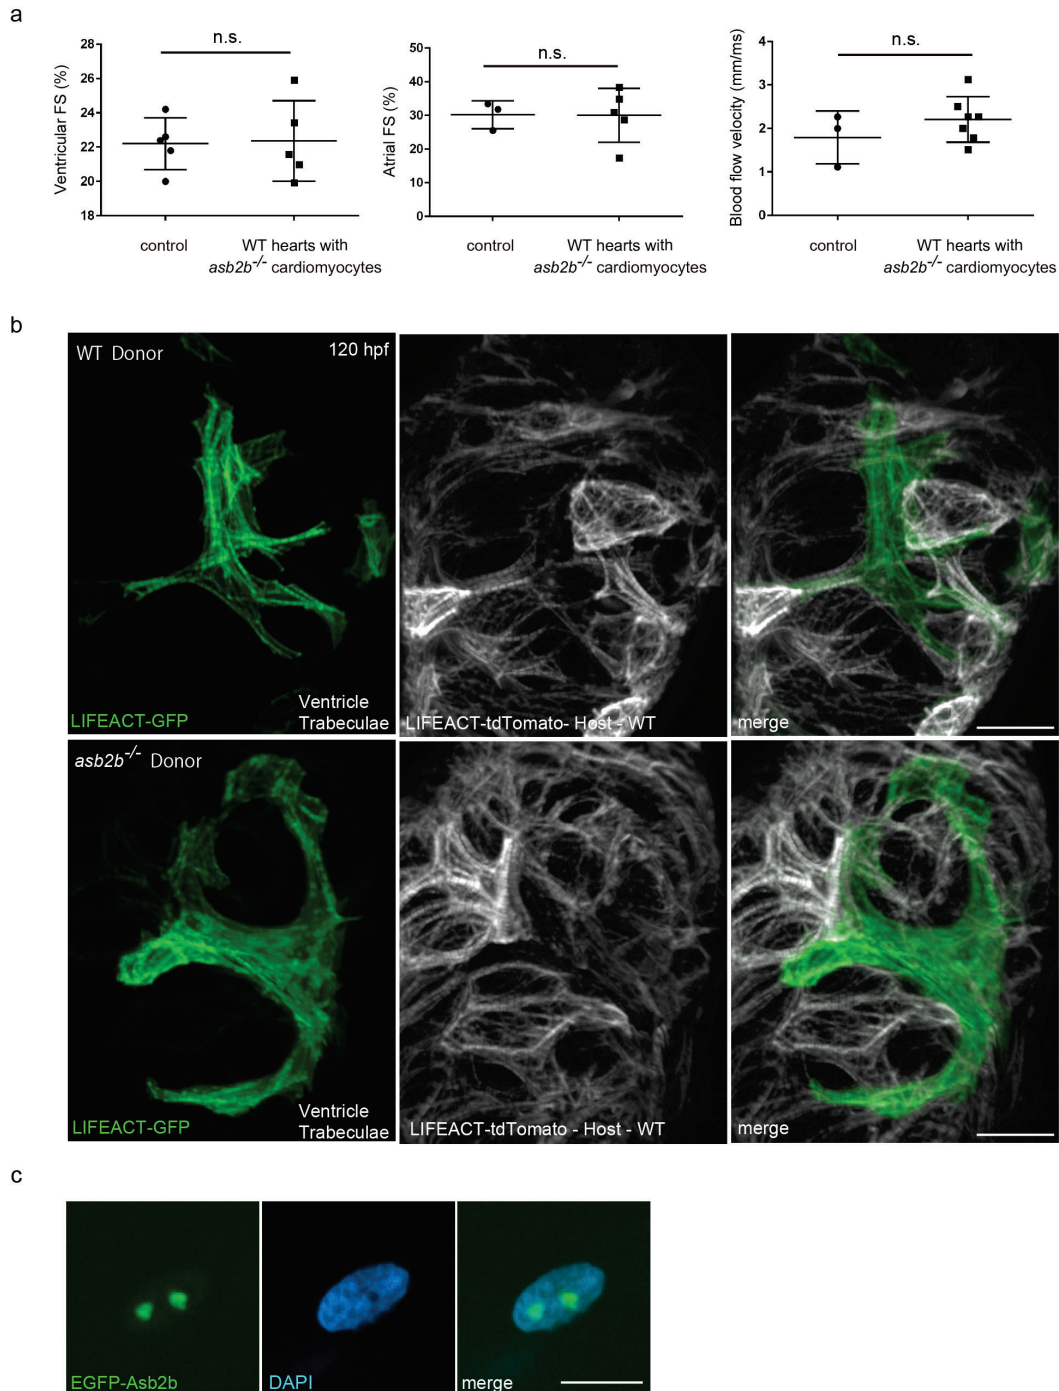

**Supplementary Figure 4 – *asb2b* mutant cardiomyocytes in WT hearts exhibit disorganized myofilaments.** (a) Quantification of fractional shortening (FS) in ventricles and atria in 50 hpf chimeric hearts, and aortic blood flow velocity. WT or *asb2b* mutant cells were transplanted into WT host embryos. No significant differences in FS or blood flow velocity were observed ( $n=3$  to 7 fish). (b) 3D images of 120 hpf chimeric ventricles. *Tg(myf7:LIFEACT-GFP)* WT or *asb2b* mutant donor cells were transplanted into *Tg(myf7:LIFEACT-tdTomato)* WT host embryos. WT donor-derived cardiomyocytes exhibit mature sarcomeres in trabecular cardiomyocytes, while *asb2b* mutant-derived cardiomyocytes exhibit disorganized sarcomeres. (c) A 50 hpf *TgBAC(asb2b:GFP-asb2b)* heart stained with DAPI (blue). Scale bars, 20  $\mu$ m.



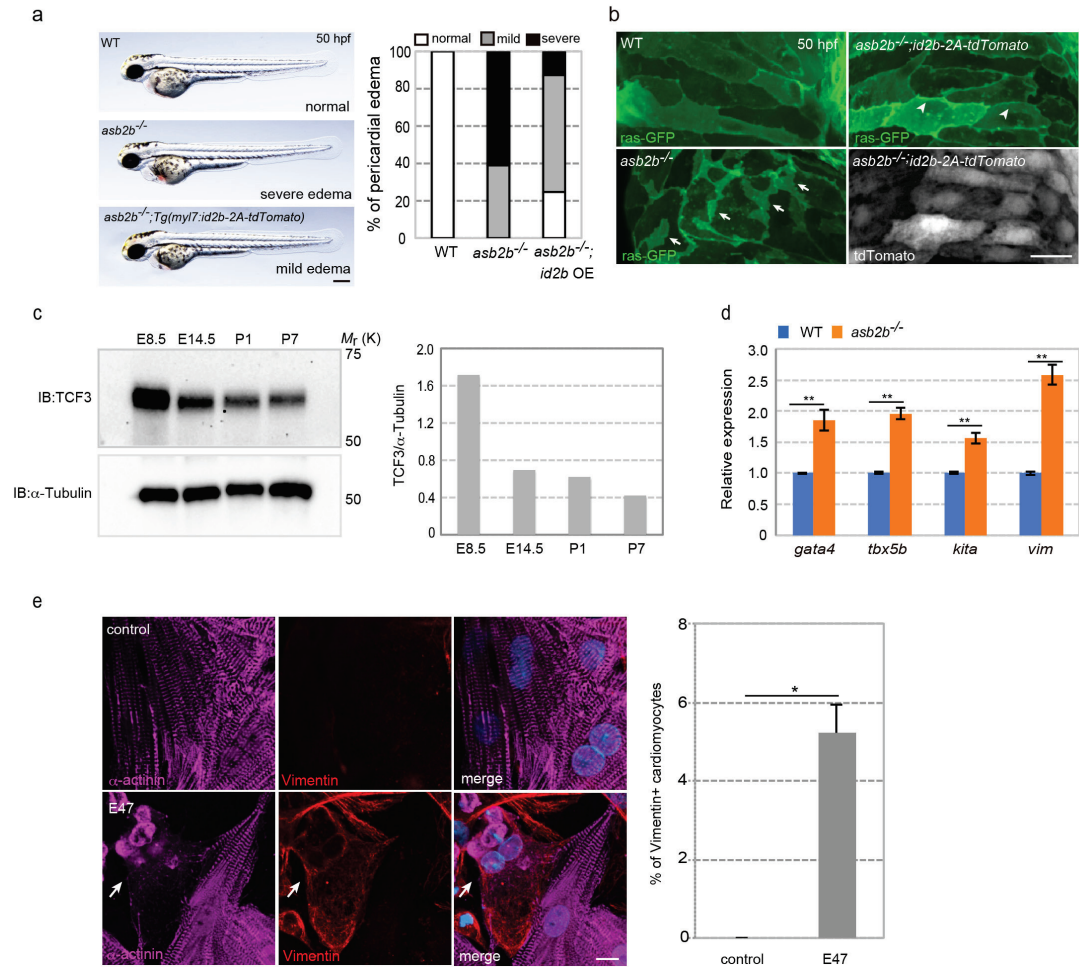

**Supplementary Figure 5 - *asb2b* mutant and TCF3 overexpressing cardiomyocytes exhibit a number of phenotypes associated with cardiomyocyte dedifferentiation.** (a) Brightfield micrographs of 50 hpf WT, *asb2b* mutant or *Tg(myl7:id2b-p2a-tdTomato)* *asb2b* mutant embryos in lateral views. Anterior to the left. Scale bar, 200  $\mu$ m. Number of fish exhibiting pericardial edema ( $n=20$  fish). (b) 3D images of 50 hpf *Tg(myl7:ras-GFP)* WT and *asb2b* mutant atria as well as *Tg(myl7:ras-GFP);Tg(myl7:id2b-2A-tdTomato)* *asb2b* mutant atria. *asb2b* mutant cardiomyocytes exhibit irregular cell-cell borders and membrane protrusions (arrows), whereas *id2b*-overexpressing *asb2b* mutant cardiomyocytes exhibit less severe morphological phenotypes (arrowheads). (c) E8.5, E14.5, P1 and P7 mouse hearts were isolated and TCF3 protein levels were analyzed; relative expression levels shown on the right. (d) Relative mRNA expression (qPCR) of *gata4*, *tbx5b*, *kita* and *vim* in isolated 50 hpf WT (blue bar) and *asb2b* mutant (orange bar) hearts ( $n=2$  technical replicates, RNA samples were obtained from 500 isolated hearts). (e) Rat NCMs transfected with control or *E47* adenovirus vectors, co-stained for  $\alpha$ -actinin (magenta), Vimentin (red) and DAPI (blue). Arrow points to a Vimentin-positive cardiomyocyte. Number of Vimentin-positive Rat NCMs ( $n=2$ , with averages taken from 50 cardiomyocytes). \* $P<0.05$ , \*\* $P<0.01$  by one-way analysis of variance (ANOVA) followed by Tukey's HSD test. Error bars, SEM. Scale bars, 20  $\mu$ m.

Uncropped images related to Fig. 4b

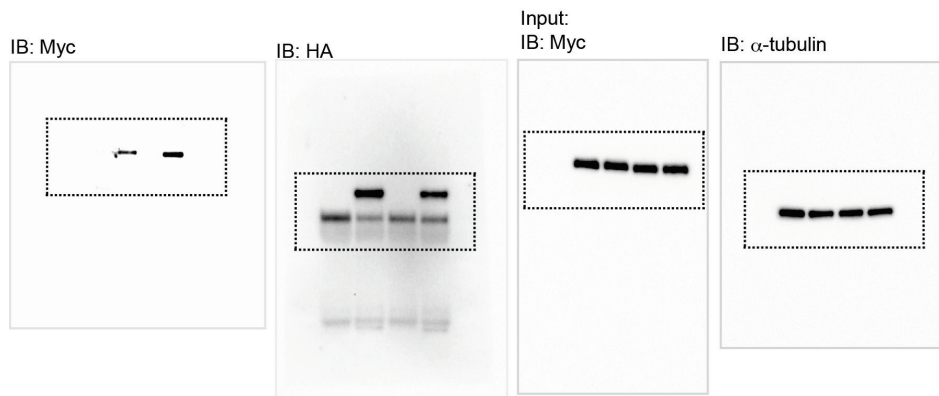

Uncropped images related to Fig. 4c

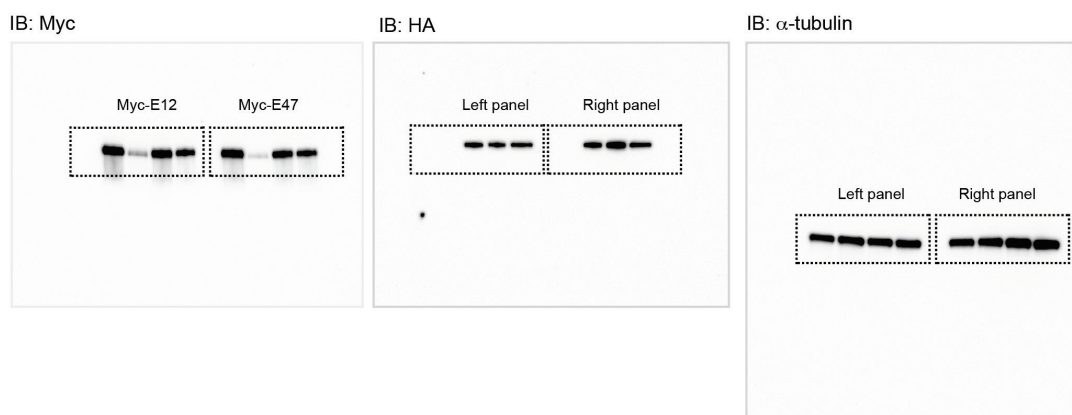

Uncropped images related to Supplementary Fig. 5c

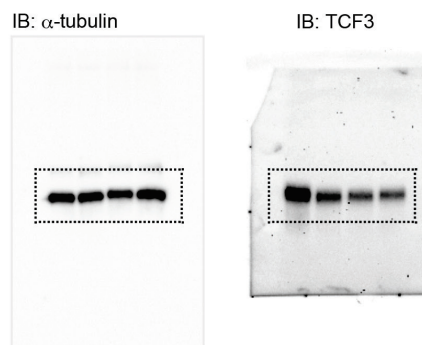

Supplementary Figure 6 – Uncropped images related to western blotting data

## Supplementary Tables

| Cardiac differentiation marker |               |                                  |                   |
|--------------------------------|---------------|----------------------------------|-------------------|
| ID                             | Gene Symbol   | Gene Name                        | ratio (mutant/WT) |
| ENSDART00000102766             | <i>ttni2a</i> | <i>troponin T type 2a</i>        | 1.20              |
| ENSDART00000150079             | <i>ttni1b</i> | <i>troponin I type 1b</i>        | 1.22              |
| ENSDART00000138911             | <i>actn2b</i> | <i>actinin, alpha 2b</i>         | 1.30              |
| ENSDART00000017677             | <i>ttna</i>   | <i>titin, tandem duplicate 2</i> | 1.87              |
| ENSDART00000125953             | <i>ttnb</i>   | <i>titin, tandem duplicate 1</i> | 1.36              |

| Supplementary Fig. 3d - Junctional components |               |                                  |                   |
|-----------------------------------------------|---------------|----------------------------------|-------------------|
| ID                                            | Gene Symbol   | Gene Name                        | ratio (mutant/WT) |
| ENSDART00000024627                            | <i>cdh2</i>   | <i>cadherin 2</i>                | 1.33              |
| ENSDART00000047272                            | <i>cx43</i>   | <i>connexin 43</i>               | 0.99              |
| ENSDART00000149871                            | <i>cx40.8</i> | <i>connexin 40.8</i>             | 1.06              |
| ENSDART00000123532                            | <i>pkp1a</i>  | <i>plakophilin 1a</i>            | 1.06              |
| ENSDART00000035899                            | <i>pkp2</i>   | <i>plakophilin 2</i>             | 0.92              |
| ENSDART00000139110                            | <i>pkp3a</i>  | <i>plakophilin 3a</i>            | 1.02              |
| ENSDART00000155685                            | <i>pkp4</i>   | <i>plakophilin 4</i>             | 1.18              |
| ENSDART00000019505                            | <i>pleca</i>  | <i>plectin a</i>                 | 1.22              |
| ENSDART00000144558                            | <i>plecb</i>  | <i>plectin b</i>                 | 1.16              |
| ENSDART00000108721                            | <i>tjp1a</i>  | <i>tight junction protein 1a</i> | 0.90              |

| Supplementary Fig. 3g - actin regulators |               |                                                   |                   |
|------------------------------------------|---------------|---------------------------------------------------|-------------------|
| ID                                       | Gene Symbol   | Gene Name                                         | ratio (mutant/WT) |
| ENSDART00000146147                       | <i>pak1</i>   | <i>p21 protein (Cdc42/Rac)-activated kinase 1</i> | 2.55              |
| ENSDART00000090528                       | <i>rhoa</i>   | <i>ras homolog family member Ca</i>               | 1.52              |
| ENSDART00000045086                       | <i>prkceb</i> | <i>protein kinase C, epsilon b</i>                | 1.96              |
| ENSDART00000105608                       | <i>prkcea</i> | <i>protein kinase C, epsilon a</i>                | 1.83              |

| TCF3 targets         |                |                                                                                                |                   |
|----------------------|----------------|------------------------------------------------------------------------------------------------|-------------------|
| ID                   | GeneSymbol     | Gene Name                                                                                      | ratio (mutant/WT) |
| ENSDART00000138887   | <i>cyp11a2</i> | <i>cytochrome P450, family 11, subfamily A, polypeptide 2</i>                                  | 3.46              |
| ENSDART00000138702   | <i>MEF2Cb</i>  | <i>myocyte enhancer factor 2cb</i>                                                             | 2.62              |
| ENSDART00000125012   | <i>caspl1</i>  | <i>caspase 6, apoptosis-related cysteine peptidase, like 1</i>                                 | 2.60              |
| ENSDART00000074181.2 | <i>zp3.2</i>   | <i>zona pellucida glycoprotein 3, tandem duplicate 2</i>                                       | 2.09              |
| ENSDART00000108974   | <i>kita</i>    | <i>kit receptor a</i>                                                                          | 2.06              |
| ENSDART00000149161   | <i>abcc8</i>   | <i>ATP-binding cassette, sub-family C (CFTR/MRP), member 8</i>                                 | 1.93              |
| ENSDART00000055537   | <i>socs1a</i>  | <i>suppressor of cytokine signaling 1a</i>                                                     | 1.84              |
| ENSDART00000063775   | <i>mal</i>     | <i>mal, T-cell differentiation protein</i>                                                     | 1.66              |
| ENSDART00000140980   | <i>sema3bl</i> | <i>sema domain, immunoglobulin domain (Ig), short basic domain, secreted, (semaphorin) 3bl</i> | 1.62              |
| ENSDART00000153127   | <i>socs3b</i>  | <i>suppressor of cytokine signaling 3b</i>                                                     | 1.56              |
| ENSDART00000137090   | <i>id2a</i>    | <i>inhibitor of DNA binding 2, dominant negative helix-loop-helix protein, a</i>               | 1.40              |

**Supplementary Table 1 – Microarray data.** 50 hpf WT and *asb2b* mutant hearts were isolated and RNA expression levels were analyzed by microarray.



Supplementary Fig. 1h

| Sample Name                  | Assay Name                    | Ct Mean |
|------------------------------|-------------------------------|---------|
| 17.5 hpf WT                  | <i>cmhc2</i>                  | 26.76   |
| 17.5 hpf <i>asb2b</i> mutant | <i>cmhc2</i>                  | 26.01   |
| 24 hpf WT                    | <i>cmhc2</i>                  | 23.77   |
| 24 hpf <i>asb2b</i> mutant   | <i>cmhc2</i>                  | 23.64   |
| 17.5 hpf WT                  | <i>vmhc</i>                   | 23.69   |
| 17.5 hpf <i>asb2b</i> mutant | <i>vmhc</i>                   | 24.09   |
| 24 hpf WT                    | <i>vmhc</i>                   | 22.19   |
| 24 hpf <i>asb2b</i> mutant   | <i>vmhc</i>                   | 22.10   |
| 17.5 hpf WT                  | <i>amhc</i>                   | 29.45   |
| 17.5 hpf <i>asb2b</i> mutant | <i>amhc</i>                   | 29.35   |
| 24 hpf WT                    | <i>amhc</i>                   | 26.30   |
| 24 hpf <i>asb2b</i> mutant   | <i>amhc</i>                   | 26.84   |
| 17.5 hpf WT                  | <i>ef1<math>\alpha</math></i> | 14.97   |
| 17.5 hpf <i>asb2b</i> mutant | <i>ef1<math>\alpha</math></i> | 15.43   |
| 24 hpf WT                    | <i>ef1<math>\alpha</math></i> | 15.19   |
| 24 hpf <i>asb2b</i> mutant   | <i>ef1<math>\alpha</math></i> | 15.30   |

Fig. 4a

| Sample Name                       | Assay Name                   | Ct Mean |
|-----------------------------------|------------------------------|---------|
| 50 hpf WT hearts                  | <i>socs3b</i>                | 25.68   |
| 50 hpf <i>asb2b</i> mutant hearts | <i>socs3b</i>                | 24.29   |
| 50 hpf WT hearts                  | <i>id2a</i>                  | 22.48   |
| 50 hpf <i>asb2b</i> mutant hearts | <i>id2a</i>                  | 22.12   |
| 50 hpf WT hearts                  | <i>mef2cb</i>                | 28.83   |
| 50 hpf <i>asb2b</i> mutant hearts | <i>mef2cb</i>                | 27.55   |
| 50 hpf WT hearts                  | <i>ef1<math>\beta</math></i> | 23.79   |
| 50 hpf <i>asb2b</i> mutant hearts | <i>ef1<math>\beta</math></i> | 23.54   |

Supplementary Fig. 5d

| Sample Name                       | Assay Name                   | Ct Mean |
|-----------------------------------|------------------------------|---------|
| 50 hpf WT hearts                  | <i>gata4</i>                 | 21.08   |
| 50 hpf <i>asb2b</i> mutant hearts | <i>gata4</i>                 | 20.51   |
| 50 hpf WT hearts                  | <i>tbx5b</i>                 | 24.14   |
| 50 hpf <i>asb2b</i> mutant hearts | <i>tbx5b</i>                 | 23.49   |
| 50 hpf WT hearts                  | <i>kita</i>                  | 25.31   |
| 50 hpf <i>asb2b</i> mutant hearts | <i>kita</i>                  | 24.98   |
| 50 hpf WT hearts                  | <i>vim</i>                   | 24.83   |
| 50 hpf <i>asb2b</i> mutant hearts | <i>vim</i>                   | 23.77   |
| 50 hpf WT hearts                  | <i>ef1<math>\beta</math></i> | 18.75   |
| 50 hpf <i>asb2b</i> mutant hearts | <i>ef1<math>\beta</math></i> | 19.07   |

**Supplementary Table 2 – qPCR data.** RNA expression levels were analyzed by RT-qPCR
